# Supplementary material for: Homogeneity in the association of body mass index with type 2 diabetes across the UK Biobank: A Mendelian randomization study
Source: PubMed Central journal article supplement (PMC6903707; doi:10.1371/journal.pmed.1002982), 2019-12-10
Supplement: pmed.1002982.s001.pdf [file pmed.1002982.s001.pdf]

A. PRS additional quantiles

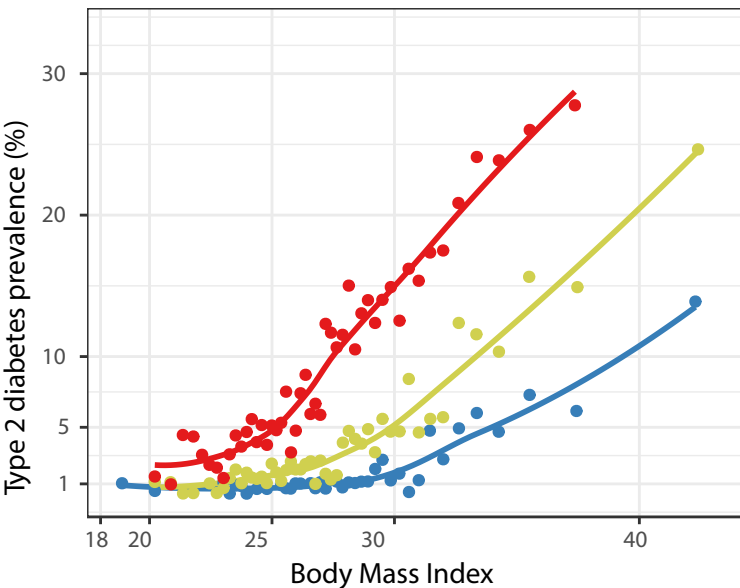

PRS quantile    ● 0-5%    ● 47.5-52.5%    ● 95-100%

B. Sex-stratified T2D prevalence by BMI

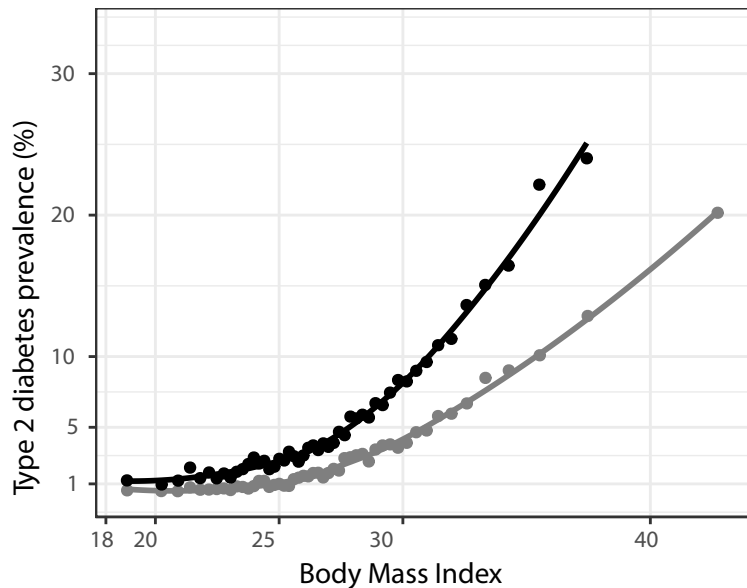

Sex    ● Female    ● Male
